# Supplementary material for: A comprehensive analysis of adverse events in the first 30 days of phase 1 pediatric CAR T-cell trials
Source: PubMed Central journal article supplement — Blood Adv. 2023 Jul 26;7(18):5566–78. doi: 10.1182/bloodadvances.2023009789 (PMC10514106; doi:10.1182/bloodadvances.2023009789), 2023-07-26

## 1. Supplemental Methods

### 1.1 Data Collection and Definitions

Adverse events (AEs) were collected per NCI Cancer Therapy Evaluation Program (CTEP) AE reporting requirements using Common Terminology Criteria for Adverse Events (CTCAE) version 4 (NCT01593696 and NCT02315612) and version 5 (NCT03448393). AEs were collected at baseline (prior to initiation of lymphodepleting chemotherapy) and through at least day +28 (+/- 4 days) disease assessment, return to home institution, or off treatment (whichever came latest). AEs were captured and graded weekly by 2 consistent data managers using patient chart data using CTCAE definitions and grading schema (as below). AEs were then verified by research nurses and clinicians directly involved in the patients' care and given an attribution to research, investigational new drug (IND), and disease per the categories listed below. AE reports were then uploaded to the NIH Adverse Event Reporting System.

#### CTCAE Grades:

**Grade 1** Mild; asymptomatic or mild symptoms; clinical or diagnostic observations only; intervention not indicated.

**Grade 2** Moderate; minimal, local or noninvasive intervention indicated; limiting age-appropriate instrumental activities of daily living (ADL).

**Grade 3** Severe or medically significant but not immediately life-threatening; hospitalization or prolongation of hospitalization indicated; disabling; limiting self care ADL.

**Grade 4** Life-threatening consequences; urgent intervention indicated.

**Grade 5** Death related to AE.

#### Adverse Event Attribution Categories:

| <u>Attribution</u> | <u>Description</u>                                |
|--------------------|---------------------------------------------------|
| Unrelated          | The AE is clearly NOT related to the intervention |
| Unlikely           | The AE is doubtfully related to the intervention  |
| Possible           | The AE may be related to the intervention         |
| Probable           | The AE is likely related to the intervention      |
| Definite           | The AE is clearly related to the intervention     |

### 1.2 Study Population

Standard protocol specific eligibility criteria (e.g., age, detectable antigen-positive disease, adequate performance status and baseline organ function) guided enrollment. Prior therapy with hematopoietic stem cell transplant (HSCT) and CAR T-cell infusion of a different product were not exclusionary, however, second infusions of the same product were not included.

### 1.3 Data Extraction

For retrospective analysis, AE data for all patients treated on the three above protocols up through data cut off of 12/31/2020 was extracted from the NIH Adverse Event Reporting System database. AEs data was edited to remove any events less than grade 3 or occurring outside the

timeframe of days 0-30. The following AE terms were eliminated: “Fever, Lymphocyte Count decreased, WBC decreased, CRS, Multiorgan Failure, CPK.” Only those AEs with at least one attribution (research, IND, disease) of possible or higher were included (in other words, any AEs with all attributions designated unlikely or unrelated were excluded). AEs that were dose limiting toxicities (DLTs) that met other criteria for inclusion in the analysis were included.

An excel file was generated for each patient, with one tab including desired demographic and disease data, and a second tab including extracted AEs meeting above criteria.

## 1.4 CAR Constructs

NCT01593696: CD19.28z CAR T-cell construct

NCT02315612: CD22.41BBz: CAR T-cell construct

NCT03448393: CD19/22.41BBz configured in a tandem structure

## 1.5 Bioinformatics & Data Analysis

AE data, patient demographics, and disease information were loaded from individual patient Excel files into Python 3.9 for preprocessing and statistical analysis. The ‘pandas’ library was used to read and load data, and ‘numpy’ library was used for subsequent numerical and statistical analyses (median, IQR, range, etc). Additional statistical analyses were done using SAS version 9.4 and GraphPad Prism 9.0. Figures were generated using GraphPad Prism 9.0 and BioRender.

## 1.6 Secondary “Focused” Analysis

### 1.6.1 Elimination of duplicates

Cumulative NC AE data was edited to focus the analysis to those NC AEs of the highest grade per AE term per patient to eliminate duplicates. If a patient had multiple of the same AE term at the same grade, the one that lasted the longest was chosen; if duration was the same, the event with the later onset was selected.

### 1.6.2 Elimination of terms with overlapping significance

Following elimination of duplicates, AEs were reviewed and any deemed to have overlapping significance for a patient at a given point in time were narrowed down to the single most representative term. For example, in one patient with hypoxia, pulmonary edema and respiratory failure, hypoxia and pulmonary edema were removed as it was felt that respiratory failure captured those terms. 12 patients were found to have overlapping terms requiring elimination of 1-4 terms.

### 1.6.3 Determination of Duration

Duration of each AE term was calculated using date of onset and date of resolution. If the AE end date was later than day +30 or if the AE had no end date, it was resolved as of day +30. Of note, 3 NC AEs were removed due to onset that occurred after day +30.

## 1.6.4 Univariate and Multivariable Analyses

The same set of univariate and multivariable analyses that were completed for the cumulative set of NC AEs as described in the methods of the primary manuscript were repeated in the focused set of NC AEs.

## 2. Supplemental Results

### 2.1 Supplemental Tables

Supplemental Table 1: Changes Between CTCAE versions 4 and 5 and Potential Impact on Findings

Supplemental Table 2: Adverse Event Categories with Included CTCAE Terms

Supplemental Table 3: Number of Patients with AEs Per System

Supplemental Table 4: Dose Limiting and Treatment Limiting Toxicities (DLTs & TLTs)

Supplemental Table 5: Comparison of Cumulative NC AE vs Focused NC AE Analyses

Supplemental Table 6: Specific AE Terms Per Clinical System in Focused Analysis

Supplemental Table 1: Changes Between CTCAE versions 4 and 5 and Potential Impact on Findings

| <b>CTCAE Toxicity Term</b> | <b>Changes between v4 and v5</b>                                                                                                                                     | <b>Impact on AE assessment</b>                                                                                                                                                              |
|----------------------------|----------------------------------------------------------------------------------------------------------------------------------------------------------------------|---------------------------------------------------------------------------------------------------------------------------------------------------------------------------------------------|
| Hypophosphatemia           | v4 was based on lab values whereas v5 defines grade 3 and 4 by medical significance, hospitalization required or prolonged or life-threatening consequences          | May lead to a lower number of events captured by v5                                                                                                                                         |
| Hyponatremia               | Grade 3 in v4 was based on lab values alone (120 to <130) whereas grade 3 in v5 required symptoms for lab values between 125-129; no change in definition of grade 4 | May lead to a lower number of grade 3 events captured by v5                                                                                                                                 |
| Hyperglycemia              | v4 was based on lab values whereas v5 defines grade 3 and 4 by insulin therapy initiated, hospitalization required or life-threatening consequences                  | May lead to lower capture of events on v5 if hyperglycemic without initiation of insulin, v4 if insulin initiated below lab threshold would still be captured by term “glucose intolerance” |
| Hyperuricemia              | v4 was based on lab values grade 3 ULN to 10mg/dL, grade 4 > 10mg/dL plus physiologic consequences whereas v5 defines grade 3 by greater                             | May lead to a lower number of events captured by v5; grade 4 per v4 by lab value alone could be considered                                                                                  |

|                                                   |                                                                                                                                                                                                                                                                                                                                                                                                                                                                                    |                                                                                                                     |
|---------------------------------------------------|------------------------------------------------------------------------------------------------------------------------------------------------------------------------------------------------------------------------------------------------------------------------------------------------------------------------------------------------------------------------------------------------------------------------------------------------------------------------------------|---------------------------------------------------------------------------------------------------------------------|
|                                                   | than ULN with physiologic consequences and grade 4 just by life-threatening consequences                                                                                                                                                                                                                                                                                                                                                                                           | grade 3 by v5 if value > 10mg/dL with physiologic but not life-threatening consequences                             |
| Alanine aminotransferase increased                | Both v4 and 5 are based on lab values, however, v4 is based on the ULN, while v5 is based on either ULN or baseline value if abnormal                                                                                                                                                                                                                                                                                                                                              | Patients with baseline abnormal (elevated) value may be captured by v4 but either not by v5 or at lower grade by v5 |
| Aspartate aminotransferase increased              | Both v4 and 5 are based on lab values, however, v4 is based on the ULN, while v5 is based on either ULN or baseline value if abnormal                                                                                                                                                                                                                                                                                                                                              | Patients with baseline abnormal (elevated) value may be captured by v4 but either not by v5 or at lower grade by v5 |
| Alkaline phosphatase increased                    | Both v4 and 5 are based on lab values, however, v4 is based on the ULN, while v5 is based on either ULN or baseline value if abnormal                                                                                                                                                                                                                                                                                                                                              | Patients with baseline abnormal (elevated) value may be captured by v4 but either not by v5 or at lower grade by v5 |
| Blood bilirubin increased                         | Both v4 and 5 are based on lab values, however, v4 is based on the ULN, while v5 is based on either ULN or baseline value if abnormal                                                                                                                                                                                                                                                                                                                                              | Patients with baseline abnormal (elevated) value may be captured by v4 but either not by v5 or at lower grade by v5 |
| GGT increased                                     | Both v4 and 5 are based on lab values, however, v4 is based on the ULN, while v5 is based on either ULN or baseline value if abnormal                                                                                                                                                                                                                                                                                                                                              | Patients with baseline abnormal (elevated) value may be captured by v4 but either not by v5 or at lower grade by v5 |
| Electrocardiogram QT corrected interval prolonged | In v4, grade 3 is based on QTc $\geq 501$ on at least 2 ECGs, whereas in v5 grade 3 is an average QTc $\geq 501$ or $>60$ ms change from baseline. In v4, grade 4 is QTc $\geq 501$ or $>60$ ms change from baseline and Torasade de pointes or polymorphic ventricular tachycardia or signs/symptoms of serious arrhythmia, whereas in v5 grade 4 is not based on QTc and only Torasade de pointes or polymorphic ventricular tachycardia or signs/symptoms of serious arrhythmia | May lead to a higher number of grade 3 events and a lower number of grade 4 events captured by v5                   |
| Hypertension                                      | Grade 3 in v5 specifies a systolic/diastolic value for children/adolescents whereas v4 combines adults and                                                                                                                                                                                                                                                                                                                                                                         | v4 may lead to fewer grade 3 events, missing the capture of young pediatric patients with blood pressures above     |

|                              |                                                                                                                                                                           |                                                                                                                                                                                       |
|------------------------------|---------------------------------------------------------------------------------------------------------------------------------------------------------------------------|---------------------------------------------------------------------------------------------------------------------------------------------------------------------------------------|
|                              | children/adolescents, and no change in definition of grade 3 values for adults or grade 4 definitions                                                                     | the 99 <sup>th</sup> percentile but not above adult thresholds                                                                                                                        |
| Vascular access complication | In v5, pulmonary embolism is grade 3 whereas in v4 it was a grade 4 event; v5 also adds hemodynamic or neurologic instability to grade 4                                  | Pulmonary embolism would be captured as grade 4 on v4 but grade 3 on v5 unless life threatening                                                                                       |
| INR increased                | v4 is based on lab values to a degree above the ULN or baseline if on anticoagulation, whereas v5 uses distinct lab values or degree above baseline if on anticoagulation | May lead to a higher number of grade 3 events captured by v5 if defined ULN is >1                                                                                                     |
| Serum amylase increased      | v5 adds “with signs or symptoms”, also v5 includes >5x ULN and asymptomatic as grade 3, whereas in v4 any value >5x ULN would be grade 4                                  | Patients with value >2-5x ULN without symptoms would be grade 3 per v4 but grade 2 per v5.<br>Patients with value >5x ULN without symptoms would be grade 4 per v4 but grade 3 per v5 |
| Lipase increased             | v5 adds “with signs or symptoms”, also v5 includes >5x ULN and asymptomatic as grade 3, whereas in v4 any value >5x ULN would be grade 4                                  | Patients with value >2-5x ULN without symptoms would be grade 3 per v4 but grade 2 per v5.<br>Patients with value >5x ULN without symptoms would be grade 4 per v4 but grade 3 per v5 |
| Diarrhea                     | Grade 3 in v4 includes “incontinence” whereas grade 3 in v5 does not, and no change in definition of grade 4 values                                                       | May lead to a lower number of grade 3 events captured by v5                                                                                                                           |
| Sepsis                       | There is no definition for grade 3 in v4 whereas v5 defines grade 3 by a positive blood culture and treatment indications, and no change in definition of grade 4 values  | May lead to a higher number of grade 3 events captured by v5                                                                                                                          |
| Acute kidney injury          | v4 incorporated creatinine in definition of AKI; whereas v5 separates out creatinine as a unique AE and identifies only $\geq$ Gr 3 AKI                                   | As both would be captured in “renal” toxicity, there is no impact on analysis                                                                                                         |
| Proteinuria                  | Grade 3 in v5 adds 4+ proteinuria in addition to $\geq$ 3.5g/24hrs to adult definition                                                                                    | May lead to a higher number of grade 3 events in adults captured by v5                                                                                                                |
| Urine output decreased       | v5 added specific child/infant definitions to both grades 3 (weight and body surface area based) and 4                                                                    | Pediatric patients with lower weight may not have been                                                                                                                                |

|                                                                                                                                                                                                                                                                                                                                  |                                                                                                                                                                                                                                      |                                                                                                                                                                                 |
|----------------------------------------------------------------------------------------------------------------------------------------------------------------------------------------------------------------------------------------------------------------------------------------------------------------------------------|--------------------------------------------------------------------------------------------------------------------------------------------------------------------------------------------------------------------------------------|---------------------------------------------------------------------------------------------------------------------------------------------------------------------------------|
|                                                                                                                                                                                                                                                                                                                                  | (pediatric definition with no urine output over 12 hours), whereas v4 had one overall definition                                                                                                                                     | captured in v4 but would be captured as grade 3 in v5                                                                                                                           |
| Intracranial hemorrhage                                                                                                                                                                                                                                                                                                          | Grade 3 in v5 includes hospitalization and uses the term “invasive intervention” whereas v4 uses the term “operative intervention,” and no change in definition of grade 4 values                                                    | May lead to a higher number of grade 3 events captured by v5 if hospitalized but no intervention indicated                                                                      |
| Delirium                                                                                                                                                                                                                                                                                                                         | Both grades 3 and 4 in v4 include “hospitalization indicated” whereas both grades 3 and 4 in v5 instead state “urgent intervention indicated,” Grade 3 in v5 includes “new onset” whereas grade 3 in v4 does not include “new onset” | Urgent intervention could mean medication rather than hospitalization, so v5 may capture more events; however, v4 could capture more grade 3 that aren’t considered “new onset” |
| <p>CTCAE v4 was used for CD19- and CD22-targeted CAR T-cell trials (n=118); v5 was used for CD19/22-targeted CAR T-cell trial (n=16)</p> <p>Abbreviations: CTCAE = Common Terminology Criteria for Adverse Events, v4= Version 4, v5 = Version 5, AE = adverse event, ULN = upper limit of normal, AKI = acute kidney injury</p> |                                                                                                                                                                                                                                      |                                                                                                                                                                                 |

Supplemental Table 2: Adverse Event Categories with Included CTCAE Terms

| <b>AE Category</b>  | <b>CTCAE Terms included</b>                                                                                                                                                                                                                                                               |
|---------------------|-------------------------------------------------------------------------------------------------------------------------------------------------------------------------------------------------------------------------------------------------------------------------------------------|
| Thrombocytopenia    | Platelet count decreased                                                                                                                                                                                                                                                                  |
| Neutropenia         | Neutrophil count decreased                                                                                                                                                                                                                                                                |
| Anemia              | Anemia                                                                                                                                                                                                                                                                                    |
| Metabolic           | Hypophosphatemia, Hypokalemia, Hypocalcemia, Hypoalbuminemia, Hyponatremia, Hypomagnesemia, Hyperglycemia, Hypermagnesemia, Hypertriglyceridemia, Hyperkalemia, Hypercalcemia, Hypernatremia, Hyperuricemia, Acidosis, Anorexia, Weight gain, Tumor lysis syndrome                        |
| Hepatic             | Alanine aminotransferase increased, Aspartate aminotransferase increased, Alkaline phosphatase increased, Blood bilirubin increased, GGT increased                                                                                                                                        |
| Febrile Neutropenia | Febrile neutropenia                                                                                                                                                                                                                                                                       |
| Cardiovascular      | Cardiac arrest, Capillary leak syndrome, Ejection fraction decreased, Electrocardiogram QT corrected interval prolonged, Hypertension, Hypotension, Left ventricular systolic dysfunction, Mitral valve disease, Sinus tachycardia, Tricuspid valve disease, Vascular access complication |
| Coagulopathy        | Activated partial thromboplastin time prolonged, Disseminated intravascular coagulation, Fibrinogen decreased, INR increased                                                                                                                                                              |
| Respiratory         | Adult respiratory distress syndrome, Apnea, Dyspnea, Hypoxia, Pulmonary edema, respiratory failure, Respiratory thoracic and mediastinal disorders-Other                                                                                                                                  |
| GI                  | Abdominal distension, Serum amylase increased, Lipase increased, Diarrhea                                                                                                                                                                                                                 |

|                                                                                                                                                                                          |                                                                                                                            |
|------------------------------------------------------------------------------------------------------------------------------------------------------------------------------------------|----------------------------------------------------------------------------------------------------------------------------|
| Infection                                                                                                                                                                                | Catheter related infection, Enterocolitis infectious, Infections and infestations-Other, Lung infection, Sepsis, Typhlitis |
| Renal                                                                                                                                                                                    | Acute kidney injury, Creatinine increased, Hemolytic uremic syndrome, Proteinuria, Urine output decreased                  |
| Pain                                                                                                                                                                                     | Abdominal pain, Back pain, Bone pain, Pain, Pain in extremity                                                              |
| Neurologic                                                                                                                                                                               | Dysphagia, Encephalopathy, Headache, Hydrocephalus, Intracranial hemorrhage, Muscle weakness left-sided, Somnolence        |
| Immunologic                                                                                                                                                                              | Immune system disorders - Other                                                                                            |
| Psychiatric                                                                                                                                                                              | Agitation, Delirium                                                                                                        |
| Musculoskeletal                                                                                                                                                                          | Joint effusion, Musculoskeletal and connective tissue disorder-Other                                                       |
| Abbreviations: AE = adverse event, CTCAE = Common Terminology Criteria for Adverse Events, GGT = gamma-glutamyl transferase, INR = international normalized ratio, GI = gastrointestinal |                                                                                                                            |

Supplemental Table 3: Number of Patients with AEs Per System

| System                                                                                                                                          | # Patients with 3+ event<br>(Based on cumulative analysis) | # Patients with 3+ event<br>(Based on restricted analysis) |
|-------------------------------------------------------------------------------------------------------------------------------------------------|------------------------------------------------------------|------------------------------------------------------------|
| All                                                                                                                                             | 109                                                        | 108                                                        |
| Metabolic                                                                                                                                       | 84                                                         | 83                                                         |
| Febrile neutropenia                                                                                                                             | 79                                                         | 76                                                         |
| Hepatic                                                                                                                                         | 42                                                         | 42                                                         |
| CV                                                                                                                                              | 32                                                         | 32                                                         |
| Coagulopathy                                                                                                                                    | 22                                                         | 21                                                         |
| Respiratory                                                                                                                                     | 13                                                         | 13                                                         |
| Infection                                                                                                                                       | 10                                                         | 10                                                         |
| Pain                                                                                                                                            | 8                                                          | 8                                                          |
| GI                                                                                                                                              | 7                                                          | 7                                                          |
| Renal                                                                                                                                           | 5                                                          | 5                                                          |
| Neuro                                                                                                                                           | 5                                                          | 5                                                          |
| Immuno                                                                                                                                          | 3                                                          | 3                                                          |
| Psych                                                                                                                                           | 2                                                          | 1                                                          |
| MSK                                                                                                                                             | 1                                                          | 1                                                          |
| Abbreviations: CV = Cardiovascular, GI = Gastrointestinal, Neuro = Neurologic, Immuno = Immunologic, Psych = Psychiatric, MSK = Musculoskeletal |                                                            |                                                            |

Supplemental Table 4: Dose Limiting and Treatment Limiting Toxicities (DLTs & TLTs)

| Patient | # DLTs | CTCAE Term                  | Grade | Number of Events | CR (Y/N) | CRS (Y/N) |
|---------|--------|-----------------------------|-------|------------------|----------|-----------|
| 1907    | 2      | Hypotension                 | 3     | 1                | Y        | Y         |
|         |        | Hypotension                 | 4     | 1                |          |           |
| 1910    | 1      | Dysphagia                   | 3     | 1                | Y        | Y         |
| 1914    | 12     | Cardiac arrest <sup>^</sup> | 4     | 1                | Y        | Y         |
|         |        |                             | 3     | 2                |          |           |

|      |    |                                                   |   |   |   |   |
|------|----|---------------------------------------------------|---|---|---|---|
|      |    | Electrocardiogram QT corrected interval           | 3 | 1 |   |   |
|      |    | prolonged                                         | 4 | 1 |   |   |
|      |    | Hypotension                                       | 3 | 1 |   |   |
|      |    | Hypotension                                       | 4 | 1 |   |   |
|      |    | Hypoxia                                           | 3 | 1 |   |   |
|      |    | Hypoxia                                           |   |   |   |   |
|      |    | Left ventricular systolic dysfunction             | 4 | 1 |   |   |
|      |    | Left ventricular systolic dysfunction             | 3 | 1 |   |   |
|      |    |                                                   | 4 | 1 |   |   |
|      |    | Pulmonary edema                                   | 4 | 1 |   |   |
|      |    | Pulmonary edema                                   |   |   |   |   |
|      |    | Respiratory failure                               |   |   |   |   |
| 1916 | 1  | Hypotension^                                      | 3 | 1 | Y | Y |
| 2202 | 2  | Diarrhea^                                         | 3 | 1 | Y | Y |
|      |    | Hypophosphatemia                                  | 4 | 1 |   |   |
| 2210 | 3  | Hypoxia                                           | 3 | 2 | N | Y |
|      |    | Hypoxia^                                          | 4 | 1 |   |   |
| 2216 | 25 | Alanine aminotransferase increased                | 4 | 1 | Y | Y |
|      |    | Aspartate aminotransferase increased              | 3 | 1 |   |   |
|      |    | Aspartate aminotransferase increased              | 4 | 2 |   |   |
|      |    | Aspartate aminotransferase increased              | 3 | 1 |   |   |
|      |    | Aspartate aminotransferase increased              | 4 | 1 |   |   |
|      |    | Blood bilirubin increased                         | 4 | 1 |   |   |
|      |    | Blood bilirubin increased                         | 3 | 1 |   |   |
|      |    | Cardiac arrest                                    | 4 | 1 |   |   |
|      |    | Cardiac arrest                                    | 3 | 1 |   |   |
|      |    | Catheter related infection                        |   |   |   |   |
|      |    | Ejection fraction decreased                       | 4 | 1 |   |   |
|      |    | Ejection fraction decreased                       | 3 | 2 |   |   |
|      |    | Ejection fraction decreased                       | 4 | 1 |   |   |
|      |    | Ejection fraction decreased                       | 3 | 1 |   |   |
|      |    | Electrocardiogram QT corrected interval prolonged | 3 | 1 |   |   |
|      |    |                                                   | 4 | 1 |   |   |
|      |    |                                                   | 4 | 2 |   |   |
|      |    | GGT increased                                     | 4 | 1 |   |   |
|      |    | Hypertriglyceridemia                              | 3 | 1 |   |   |
|      |    | Hypertriglyceridemia                              | 4 | 1 |   |   |
|      |    | Hypotension                                       | 3 | 1 |   |   |
|      |    | Lipase increased                                  | 4 | 1 |   |   |
|      |    | Lipase increased                                  | 3 | 1 |   |   |



|      |   |                                                                                                                                                                                                                     |                                 |                                 |      |   |
|------|---|---------------------------------------------------------------------------------------------------------------------------------------------------------------------------------------------------------------------|---------------------------------|---------------------------------|------|---|
|      |   | Respiratory failure<br>Sepsis<br>Serum amylase increased<br>Serum amylase increased<br>Typhlitis<br>Urine output decreased<br>Weight gain                                                                           |                                 |                                 |      |   |
| 2219 | 3 | Hypertriglyceridemia<br>Hypertriglyceridemia                                                                                                                                                                        | 3<br>4                          | 2<br>1                          | N    | Y |
| 2221 | 2 | Hypertriglyceridemia                                                                                                                                                                                                | 3                               | 2                               | Y    | Y |
| 2224 | 6 | Acidosis<br>Adult respiratory distress syndrome<br>Dyspnea<br>Hypotension<br>Hypoxia                                                                                                                                | 3<br>5<br>3<br>3<br>4           | 1<br>1<br>1<br>1<br>1           | N/A* | Y |
| 2231 | 1 | Hypokalemia                                                                                                                                                                                                         | 4                               | 1                               | Y    | Y |
| 2232 | 8 | Alanine aminotransferase increased<br>Aspartate aminotransferase increased<br>Aspartate aminotransferase increased<br>Disseminated intravascular coagulation<br>Hypertension<br>Hypertriglyceridemia<br>Hypokalemia | 3<br>3<br>4<br>3<br>3<br>4<br>4 | 1<br>1<br>2<br>1<br>1<br>1<br>1 | Y    | Y |
| 2233 | 3 | Alanine aminotransferase increased<br>Disseminated intravascular coagulation<br>Immune system disorder - Other                                                                                                      | 4<br>3<br>3                     | 1<br>1<br>1                     | Y    | Y |
| 2242 | 1 | Hypoxia                                                                                                                                                                                                             | 3                               | 1                               | N    | Y |
| 2244 | 1 | Hypoxia                                                                                                                                                                                                             | 3                               | 1                               | Y    | Y |
| 2251 | 2 | Acute kidney injury                                                                                                                                                                                                 | 4                               | 1                               | Y    | Y |

|                                                                                                                                                                                                                                                                                                                  |  |                             |   |   |   |   |
|------------------------------------------------------------------------------------------------------------------------------------------------------------------------------------------------------------------------------------------------------------------------------------------------------------------|--|-----------------------------|---|---|---|---|
|                                                                                                                                                                                                                                                                                                                  |  | Hypoxia                     | 3 | 1 |   |   |
| 2263                                                                                                                                                                                                                                                                                                             |  | Intracranial hemorrhage     | 4 | 1 | Y | Y |
| 192214                                                                                                                                                                                                                                                                                                           |  | Encephalopathy <sup>^</sup> | 3 | 1 | Y | Y |
| <sup>^</sup> Dose Limiting Toxicity (DLT)<br>*Patient unable to undergo disease assessment due to early death<br>Abbreviations: CTCAE = Common Terminology Criteria for Adverse Events, DLT = Dose Limiting Toxicity, TLT = Treatment Limiting Toxicity, CR = Complete Response, CRS = Cytokine Release Syndrome |  |                             |   |   |   |   |

Supplemental Table 5: Comparison of Cumulative NC AE vs Focused NC AE Analyses

| Measure          | Cumulative Analysis                                                                  | Focused Analysis                                                                   | Notes                                                                                                                                                                                                                                                                                                               |
|------------------|--------------------------------------------------------------------------------------|------------------------------------------------------------------------------------|---------------------------------------------------------------------------------------------------------------------------------------------------------------------------------------------------------------------------------------------------------------------------------------------------------------------|
| <b>Incidence</b> |                                                                                      |                                                                                    |                                                                                                                                                                                                                                                                                                                     |
| Incidence All    | All: 1719<br>Patients: 133 (99.3%)<br>Median: 10<br>IQR: 4-19                        | All: 702 events<br>Patients: 133 (99.3%)<br>Median: 4.5<br>IQR: 2-7                | 1017 fewer AEs (18 AEs from cumulative analysis removed in focused analysis for reasons other than duplication: onset after day +3, not attributed to research or disease)                                                                                                                                          |
| Incidence NC     | NC: 737<br>Patients: 109 (81.3%)<br>Median: 3<br>IQR: 1-8                            | NC: 457<br>Patients: 108 (80.6%)<br>Median: 3<br>IQR: 1-5                          | 280 fewer AEs (6 AEs from cumulative analysis removed in focused analysis due to reasons other than duplication: onset after day +3, not attributed to research or disease)<br>1 fewer patient with NC AEs in focused analysis as 1 patient was found to have NC AEs with onset after day +30 so these were removed |
| Across trials    | CD19: 193 events<br>Median 3, IQR 0-6<br><br>CD22: 512 events<br>Median: 5, IQR 2-10 | CD19: 109 events<br>Median 2, IQR 0-3<br><br>CD22: 324 events<br>Median 4, IQR 2-6 | No major change, same degree of significant differences across trials                                                                                                                                                                                                                                               |

|                 |                                                                                                                                                                                                                                    |                                                                                                                                                                                                                                  |                                      |
|-----------------|------------------------------------------------------------------------------------------------------------------------------------------------------------------------------------------------------------------------------------|----------------------------------------------------------------------------------------------------------------------------------------------------------------------------------------------------------------------------------|--------------------------------------|
|                 | <p>CD1922: 32 events<br/>Median: 1, IQR 0-3.75</p> <p>Kruskal-Wallis: <b>p &lt; 0.0001</b></p> <p>Mann-Whitney:<br/>CD19 vs CD22: <b>p = 0.0010</b></p> <p>CD1922 vs CD22: <b>p = 0.0002</b></p> <p>CD19 vs CD1922:<br/>p=0.22</p> | <p>CD1922: 24 events<br/>Median 1, IQR 0-2.75</p> <p>Kruskal-Wallis: <b>p &lt; 0.0001</b></p> <p>Mann-Whitney:<br/>CD19 vs CD22: <b>p &lt; 0.0001</b></p> <p>CD1922 vs CD22: <b>p = 0.0002</b></p> <p>CD19 vs CD1922: p=0.31</p> |                                      |
| <b>Outcomes</b> |                                                                                                                                                                                                                                    |                                                                                                                                                                                                                                  |                                      |
| CRS vs No CRS   | <p>CRS<br/>N=104<br/>NC events: 685<br/>Median: 4.5<br/>IQR: 1.25-9</p> <p>No CRS<br/>N=30<br/>NC events: 52<br/>Median: 1<br/>IQR: 0-3<br/>CRS vs No CRS:<br/>Mann-Whitney: <b>p &lt; 0.0001</b></p>                              | <p>CRS<br/>N=104<br/>NC events: 423<br/>Median: 3<br/>IQR: 1-5.75</p> <p>No CRS<br/>N=30<br/>NC events: 34<br/>Median: 1<br/>IQR: 0-2</p> <p>CRS vs No CRS:<br/>Mann-Whitney: <b>p &lt; 0.0001</b></p>                           | Similar, no major difference         |
| CRS Max Grade   | <p>Max CRS 1-2<br/>N=81<br/>NC events: 417<br/>Median: 3<br/>IQR: 1-8.5</p> <p>Max CRS 3-4<br/>N=23<br/>NC events: 268<br/>Median: 7<br/>IQR: 5-12</p> <p>Max CRS 1-2 vs 3-4<br/>Mann-Whitney:<br/><b>p=0.0002</b></p>             | <p>Max CRS 1-2<br/>N=81<br/>NC events: 263<br/>Median: 3<br/>IQR: 1-5</p> <p>Max CRS 3-4<br/>N=23<br/>NC events: 160<br/>Median: 5<br/>IQR: 4-8</p> <p>Max CRS 1-2 vs 3-4<br/>Mann-Whitney:<br/><b>p=0.0001</b></p>              | Similar, no major difference         |
| CR vs No CR     | <p>CR<br/>N=88</p>                                                                                                                                                                                                                 | <p>CR<br/>N=88</p>                                                                                                                                                                                                               | Focused analysis demonstrated a more |

|                       |                                                                                                                                                                                                                                                                                                                                                                                                                                                                 |                                                                                                                                                                                                                                                                                                                                                                                                                                                              |                                                                                                                                                      |
|-----------------------|-----------------------------------------------------------------------------------------------------------------------------------------------------------------------------------------------------------------------------------------------------------------------------------------------------------------------------------------------------------------------------------------------------------------------------------------------------------------|--------------------------------------------------------------------------------------------------------------------------------------------------------------------------------------------------------------------------------------------------------------------------------------------------------------------------------------------------------------------------------------------------------------------------------------------------------------|------------------------------------------------------------------------------------------------------------------------------------------------------|
|                       | <p>NC events: 538<br/>Median: 4<br/>IQR: 1-8</p> <p>No CR:<br/>N=45<br/>NC events: 189<br/>Median: 3<br/>IQR: 0-5.5</p> <p>CR vs no CR<br/>Mann-Whitney: p=0.10</p>                                                                                                                                                                                                                                                                                             | <p>NC events: 334<br/>Median: 3<br/>IQR: 1-5</p> <p>No CR:<br/>N=45<br/>NC events: 115<br/>Median: 2<br/>IQR: 0-4</p> <p>CR vs no CR<br/>Mann-Whitney: <b>p=0.037</b></p>                                                                                                                                                                                                                                                                                    | <p>significant increase<br/>in NC AEs in<br/>patients who<br/>achieved a CR<br/>versus those who did<br/>not compared to<br/>cumulative analysis</p> |
| CR and CRS            | <p>+CR+CRS<br/>N=86<br/>NC events: 537<br/>Median: 4<br/>IQR: 1-8.25</p> <p>+CR-CRS<br/>N=2<br/>NC events: 1<br/>Median: 0.5<br/>IQR: 0-1</p> <p>-CR+CRS<br/>N=17<br/>NC events: 138<br/>Median: 7<br/>IQR: 4-11</p> <p>-CR-CRS<br/>N=28<br/>NC events: 51<br/>Median: 1<br/>IQR: 0-3</p> <p>Kruskal-Wallis:<br/><b>p &lt;0.0001</b><br/>Mann Whitney<br/>+CR+CRS vs -CR+CRS:<br/>p = 0.071<br/>Mann Whitney<br/>-CR+CRS vs -CR-CRS:<br/><b>p&lt;0.0001</b></p> | <p>+CR+CRS<br/>N=86<br/>NC events: 333<br/>Median: 3<br/>IQR: 1-5</p> <p>+CR-CRS<br/>N=2<br/>NC events: 1<br/>Median: 0.5<br/>IQR: 0-1</p> <p>-CR+CRS<br/>N=17<br/>NC events: 82<br/>Median: 4<br/>IQR: 3-6.5</p> <p>-CR-CRS<br/>N=28<br/>NC events: 33<br/>Median: 1<br/>IQR: 0-2</p> <p>Kruskal-Wallis:<br/><b>p &lt;0.0001</b><br/>Mann Whitney<br/>+CR+CRS vs -CR+CRS:<br/>p = 0.091<br/>Mann Whitney<br/>-CR+CRS vs -CR-CRS:<br/><b>p&lt;0.0001</b></p> | <p>Similar, no major<br/>difference</p>                                                                                                              |
| <b>Disease Burden</b> |                                                                                                                                                                                                                                                                                                                                                                                                                                                                 |                                                                                                                                                                                                                                                                                                                                                                                                                                                              |                                                                                                                                                      |

|                     |                                                                                                                                                                                                                                                                                                                                                                                                |                                                                                                                                                                                                                                                                                                                                                                                             |                                                                                                                                        |
|---------------------|------------------------------------------------------------------------------------------------------------------------------------------------------------------------------------------------------------------------------------------------------------------------------------------------------------------------------------------------------------------------------------------------|---------------------------------------------------------------------------------------------------------------------------------------------------------------------------------------------------------------------------------------------------------------------------------------------------------------------------------------------------------------------------------------------|----------------------------------------------------------------------------------------------------------------------------------------|
| Bone Marrow Disease | <p>M1 &lt;5%<br/>N=43<br/>NC events: 113<br/>Median: 1<br/>IQR: 0-3</p> <p>M2 5-25%<br/>N=23<br/>NC events: 92<br/>Median: 2<br/>IQR: 1-4</p> <p>M3 &gt;25%<br/>N=68<br/>NC events: 532<br/>Median: 5.5<br/>IQR: 3-10</p> <p>Kruskal-Wallis: <b>p&lt;0.0001</b><br/>Mann-Whitney M1 vs M2: p=0.21<br/>Mann-Whitney M1 vs M3: <b>p&lt;0.0001</b><br/>Mann-Whitney M2 vs M3: <b>p=0.0055</b></p> | <p>M1 &lt;5%:<br/>N=43<br/>NC events: 76<br/>Median: 1<br/>IQR: 0-3</p> <p>M2 5-25%<br/>N=23<br/>NC events: 60<br/>Median: 2<br/>IQR: 1-4</p> <p>M3 &gt;25%<br/>N=68<br/>NC events: 321<br/>Median: 4<br/>IQR: 2-6</p> <p>Kruskal-Wallis: <b>p&lt;0.0001</b><br/>Mann Whitney M1 vs M2: p=0.31<br/>Mann Whitney M1 vs M3: <b>p&lt;0.0001</b><br/>Mann Whitney M2 vs M3: <b>p=0.0066</b></p> | <p>Same findings, significantly higher NC AEs in patients with higher BM disease; particularly those with M3 compared to M2 and M1</p> |
| CNS Disease         | <p>CNS2+<br/>N=7<br/>NC events: 47<br/>Median: 5<br/>IQR: 1-14</p> <p>CNS1<br/>N=127<br/>NC events: 690<br/>Median: 3<br/>IQR: 1-7<br/>Mann-Whitney: p=0.43</p>                                                                                                                                                                                                                                | <p>CNS2+<br/>N=7<br/>NC events: 24<br/>Median: 3<br/>IQR: 1-6</p> <p>CNS1<br/>N=127<br/>NC events: 433<br/>Median: 3<br/>IQR: 1-5<br/>Mann-Whitney: p=0.65</p>                                                                                                                                                                                                                              | <p>No difference, still not significant</p>                                                                                            |
| EMD                 | <p>EMD<br/>N= 24<br/>NC events: 160<br/>Median: 5<br/>IQR: 1.5-10.5</p> <p>No EMD<br/>N=110</p>                                                                                                                                                                                                                                                                                                | <p>EMD<br/>N= 24<br/>NC events: 88<br/>Median: 3.5<br/>IQR: 1-5</p> <p>No EMD<br/>N=110</p>                                                                                                                                                                                                                                                                                                 | <p>No difference, still not significant</p>                                                                                            |

|                              |                                                                                                                                                                                                                                                                                                                                                                                     |                                                                                                                                                                                                                                                                                                                                                                                  |                                      |
|------------------------------|-------------------------------------------------------------------------------------------------------------------------------------------------------------------------------------------------------------------------------------------------------------------------------------------------------------------------------------------------------------------------------------|----------------------------------------------------------------------------------------------------------------------------------------------------------------------------------------------------------------------------------------------------------------------------------------------------------------------------------------------------------------------------------|--------------------------------------|
|                              | NC events: 577<br>Median: 3<br>IQR: 1-7<br><br>Mann-Whitney: p=0.14                                                                                                                                                                                                                                                                                                                 | NC events: 369<br>Median: 2.5<br>IQR: 1-4.25<br><br>Mann-Whitney: p=0.31                                                                                                                                                                                                                                                                                                         |                                      |
| <b>Baseline Demographics</b> |                                                                                                                                                                                                                                                                                                                                                                                     |                                                                                                                                                                                                                                                                                                                                                                                  |                                      |
| Age                          | <p>&lt;12 years<br/>N=45<br/>NC events: 197<br/>Median: 3<br/>IQR: 1-6</p> <p>12-17 years<br/>N=34<br/>NC events: 157<br/>Median 2<br/>IQR: 1-5.25</p> <p>18+ years<br/>N=55<br/>NC events: 383<br/>Median: 5<br/>IQR: 1-9</p> <p>Kruskal-Wallis: p=0.13<br/>Mann-Whitney &lt;12 vs 12-17: p=0.42<br/>Mann-Whitney &lt;12 vs 18+: p=0.15<br/>Mann-Whitney 12-17 vs 18+: p=0.075</p> | <p>&lt;12 years<br/>N=45<br/>NC events: 141<br/>Median: 3<br/>IQR: 1-4.5</p> <p>12-17 years<br/>N=34<br/>NC events: 95<br/>Median 2<br/>IQR: 1-4</p> <p>18+ years<br/>N=55<br/>NC events: 221<br/>Median: 3<br/>IQR: 1-5</p> <p>Kruskal-Wallis: p=0.39<br/>Mann-Whitney &lt;12 vs 12-17: p=0.33<br/>Mann-Whitney &lt;12 vs 18+: p=0.58<br/>Mann-Whitney 12-17 vs 18+: p=0.20</p> | No difference, still not significant |
| Ethnicity                    | <p>Non-Hispanic<br/>N=94<br/>NC events: 570<br/>Median: 3<br/>IQR: 1-9</p> <p>Hispanic<br/>N=40<br/>NC events: 167<br/>Median: 3.5<br/>IQR: 1-5.75</p> <p>Mann-Whitney: p=0.67</p>                                                                                                                                                                                                  | <p>Non-Hispanic<br/>N=94<br/>NC events: 349<br/>Median: 3<br/>IQR: 1-6</p> <p>Hispanic<br/>N=40<br/>NC events: 108<br/>Median: 2<br/>IQR: 1-4</p> <p>Mann-Whitney: p=0.47</p>                                                                                                                                                                                                    | No difference, still not significant |
| Race                         | White<br>N=96                                                                                                                                                                                                                                                                                                                                                                       | White<br>N=96                                                                                                                                                                                                                                                                                                                                                                    | No difference, still not significant |

|  |                                                                                                                                                                                                                                                                                                                                                                                                                                                                                                                                                                                                    |                                                                                                                                                                                                                                                                                                                                                                                                                                                                                                                                                                                                       |  |
|--|----------------------------------------------------------------------------------------------------------------------------------------------------------------------------------------------------------------------------------------------------------------------------------------------------------------------------------------------------------------------------------------------------------------------------------------------------------------------------------------------------------------------------------------------------------------------------------------------------|-------------------------------------------------------------------------------------------------------------------------------------------------------------------------------------------------------------------------------------------------------------------------------------------------------------------------------------------------------------------------------------------------------------------------------------------------------------------------------------------------------------------------------------------------------------------------------------------------------|--|
|  | <p>NC events: 545<br/>Median: 3<br/>IQR: 1-7.75</p> <p>Black<br/>N=5<br/>NC events: 22<br/>Median: 3<br/>IQR: 0.5-9</p> <p>Asian<br/>N=10<br/>NC events: 50<br/>Median: 4.5<br/>IQR: 1.5-9.25</p> <p>Hawaiian/PI<br/>N=2<br/>NC events: 8<br/>Median: 4<br/>IQR: 0-8</p> <p>Multi-Race<br/>N=6<br/>NC events: 45<br/>Median: 6<br/>IQR: 1.5-12.25</p> <p>Unknown<br/>N=15<br/>NC events: 67<br/>Median: 3<br/>IQR: 1-4</p> <p>Kruskal-Wallis: p=0.95</p> <p><i>Race by White vs Non-White</i></p> <p>White<br/>N=96<br/>NC events: 545<br/>Median: 3<br/>IQR: 1-7.75</p> <p>Non-White<br/>N=23</p> | <p>NC events: 336<br/>Median: 3<br/>IQR: 1-4.75</p> <p>Black<br/>N=5<br/>NC events: 14<br/>Median: 2<br/>IQR: 0.5-5.5</p> <p>Asian<br/>N=10<br/>NC events: 37<br/>Median: 3.5<br/>IQR: 1.5-5.5</p> <p>Hawaiian/PI<br/>N=2<br/>NC events: 6<br/>Median: 3<br/>IQR: 0-6</p> <p>Multi-Race<br/>N=6<br/>NC events: 25<br/>Median: 3.5<br/>IQR: 0.75-7.75</p> <p>Unknown<br/>N=15<br/>NC events: 39<br/>Median: 2<br/>IQR: 1-3</p> <p>Kruskal-Wallis: p=0.86</p> <p><i>Race by White vs Non-White</i></p> <p>White<br/>N=96<br/>NC events: 336<br/>Median: 3<br/>IQR: 1-4.75</p> <p>Non-White<br/>N=23</p> |  |
|--|----------------------------------------------------------------------------------------------------------------------------------------------------------------------------------------------------------------------------------------------------------------------------------------------------------------------------------------------------------------------------------------------------------------------------------------------------------------------------------------------------------------------------------------------------------------------------------------------------|-------------------------------------------------------------------------------------------------------------------------------------------------------------------------------------------------------------------------------------------------------------------------------------------------------------------------------------------------------------------------------------------------------------------------------------------------------------------------------------------------------------------------------------------------------------------------------------------------------|--|

|                         |                                                                                                                                                                                                                                                                                                                                                  |                                                                                                                                                                                                                                                                                                                                                  |                                      |
|-------------------------|--------------------------------------------------------------------------------------------------------------------------------------------------------------------------------------------------------------------------------------------------------------------------------------------------------------------------------------------------|--------------------------------------------------------------------------------------------------------------------------------------------------------------------------------------------------------------------------------------------------------------------------------------------------------------------------------------------------|--------------------------------------|
|                         | NC events: 125<br>Median: 5<br>IQR: 1-9<br><br>Mann Whitney p=0.58                                                                                                                                                                                                                                                                               | NC events: 82<br>Median: 3<br>IQR: 1-6<br><br>Mann Whitney p=0.50                                                                                                                                                                                                                                                                                |                                      |
| Sex                     | Female<br>N=37<br>NC events: 206<br>Median: 3<br>IQR: 1-6.5<br><br>Male<br>N=97<br>NC events: 531<br>Median: 4<br>IQR: 1-8<br><br>Mann-Whitney: p=0.55                                                                                                                                                                                           | Female<br>N=37<br>NC events: 131<br>Median: 3<br>IQR: 1-4.5<br><br>Male<br>N=97<br>NC events: 326<br>Median: 3<br>IQR: 1-5<br><br>Mann-Whitney: p=0.82                                                                                                                                                                                           | No difference, still not significant |
| <b>Prior Treatments</b> |                                                                                                                                                                                                                                                                                                                                                  |                                                                                                                                                                                                                                                                                                                                                  |                                      |
| # Prior Therapies       | ≤2 Regimens<br>N=19<br>NC events: 68<br>Median: 2<br>IQR: 0-6<br><br>3-5 Regimens<br>N=60<br>NC events: 361<br>Median: 3<br>IQR: 1-8.75<br><br>>5 Regimens<br>N=55<br>NC events: 308<br>Median: 4<br>IQR: 1-7<br><br>Kruskal-Wallis: p=0.39<br>Mann-Whitney ≤2 vs 3-5: p=0.30<br>Mann-Whitney ≤2 vs >5: p=0.18<br>Mann-Whitney 3-5 vs >5: p=0.63 | ≤2 Regimens<br>N=19<br>NC events: 46<br>Median: 2<br>IQR: 0-4<br><br>3-5 Regimens<br>N=60<br>NC events: 223<br>Median: 2<br>IQR: 1-4.75<br><br>>5 Regimens<br>N=55<br>NC events: 188<br>Median: 3<br>IQR: 1-5<br><br>Kruskal-Wallis: p=0.40<br>Mann-Whitney ≤2 vs 3-5: p=0.42<br>Mann-Whitney ≤2 vs >5: p=0.17<br>Mann-Whitney 3-5 vs >5: p=0.50 | No difference, still not significant |
| Prior HSCT              | No Prior HSCT<br>N=58                                                                                                                                                                                                                                                                                                                            | No Prior HSCT<br>N=58                                                                                                                                                                                                                                                                                                                            | No difference, still not significant |



|             |                                                                                                                                                                                       |                                                                                                                                                                                      |                                      |
|-------------|---------------------------------------------------------------------------------------------------------------------------------------------------------------------------------------|--------------------------------------------------------------------------------------------------------------------------------------------------------------------------------------|--------------------------------------|
|             | <p>NC events: 274<br/>Median: 3<br/>IQR: 1-6.25</p> <p>Prior HSCT<br/>N=76<br/>NC events: 463<br/>Median: 4<br/>IQR: 1-8.75</p> <p>Mann-Whitney: p=0.29</p>                           | <p>NC events: 187<br/>Median: 2<br/>IQR: 1-4.25</p> <p>Prior HSCT<br/>N=76<br/>NC events: 270<br/>Median: 3<br/>IQR: 1-5</p> <p>Mann-Whitney: p=0.52</p>                             |                                      |
| Prior CAR   | <p>No Prior CAR<br/>N=80<br/>NC events: 448<br/>Median: 3<br/>IQR: 0.25-8</p> <p>Prior CAR<br/>N=54<br/>NC events: 289<br/>Median: 4<br/>IQR: 1-7</p> <p>Mann-Whitney: p=0.36</p>     | <p>No Prior CAR<br/>N=80<br/>NC events: 267<br/>Median: 2<br/>IQR: 0.25-4.75</p> <p>Prior CAR<br/>N=54<br/>NC events: 190<br/>Median: 3<br/>IQR: 1-5</p> <p>Mann-Whitney: p=0.14</p> | No difference, still not significant |
| Prior Blina | <p>No Prior Blina<br/>N=90<br/>NC events: 472<br/>Median: 3<br/>IQR: 1-7</p> <p>Prior Blina<br/>N=44<br/>NC events: 265<br/>Median: 4<br/>IQR: 1-9.75</p> <p>Mann-Whitney: p=0.11</p> | <p>No Prior Blina<br/>N=90<br/>NC events: 295<br/>Median: 2<br/>IQR: 1-4</p> <p>Prior Blina<br/>N=44<br/>NC events: 162<br/>Median: 3<br/>IQR: 1-5</p> <p>Mann-Whitney: p=0.11</p>   | No difference, still not significant |
| Prior Ino   | <p>No Prior Ino<br/>N=111<br/>NC events: 546<br/>Median: 3<br/>IQR: 1-6</p> <p>Prior Ino<br/>N=23<br/>NC events: 191</p>                                                              | <p>No Prior Ino<br/>N=111<br/>NC events: 345<br/>Median: 2<br/>IQR: 1-4</p> <p>Prior Ino<br/>N=23<br/>NC events: 112</p>                                                             | Still significant difference         |

|                                                                                                                                                                                                                                                                                                                                                                             |                                                            |                                                               |  |
|-----------------------------------------------------------------------------------------------------------------------------------------------------------------------------------------------------------------------------------------------------------------------------------------------------------------------------------------------------------------------------|------------------------------------------------------------|---------------------------------------------------------------|--|
|                                                                                                                                                                                                                                                                                                                                                                             | Median: 6<br>IQR: 2-14<br><br>Mann-Whitney: <b>p=0.012</b> | Median: 4<br>IQR: 2-7<br><br>Mann-Whitney:<br><b>p=0.0076</b> |  |
| Abbreviations: NC = Non-cytopenic, AE = Adverse Event, IQR = Interquartile Range, CRS = Cytokine Release Syndrome, CR = Complete Response, M1 <5%, M2 5-25%, M3 >25%, CNS = Central Nervous System, EMD = Extramedullary Disease, PI = Pacific Islander, HSCT = Hematopoietic Stem Cell Transplant, CAR = Chimeric Antigen Receptor, Blina = Blinatumomab, Ino = Inotuzumab |                                                            |                                                               |  |

Supplementary Table 6: Specific AE Terms Per Clinical System in Focused Analysis

| <b>Hepatic</b>                                                   |    |
|------------------------------------------------------------------|----|
| Alanine aminotransferase increased                               | 28 |
| Aspartate aminotransferase increased                             | 38 |
| Alkaline phosphatase increased                                   | 3  |
| Blood bilirubin increased                                        | 7  |
| GGT increased                                                    | 1  |
| <b>Cardiovascular</b>                                            |    |
| Capillary leak syndrome                                          | 1  |
| Cardiac arrest                                                   | 2  |
| Ejection fraction decreased                                      | 3  |
| Electrocardiogram QT corrected interval prolonged                | 4  |
| Hypertension                                                     | 9  |
| Hypotension                                                      | 19 |
| Mitral valve disease                                             | 1  |
| Sinus tachycarida                                                | 2  |
| Tricuspid valve disease                                          | 1  |
| Vascular access complication                                     | 1  |
| <b>Respiratory</b>                                               |    |
| Adult respiratory distress syndrome                              | 1  |
| Apnea                                                            | 1  |
| Dyspnea                                                          | 2  |
| Hypoxia                                                          | 8  |
| Respiratory failure                                              | 2  |
| Respiratory, thoracic and mediastinal disorders - Other, specify | 1  |
| <b>Neurologic</b>                                                |    |
| Dysphagia                                                        | 1  |

|                                              |   |
|----------------------------------------------|---|
| Encephalopathy                               | 1 |
| Headache                                     | 2 |
| Intracranial hemorrhage                      | 1 |
| <b>Infection</b>                             |   |
| Catheter related infection                   | 3 |
| Enterocolitis infectious                     | 1 |
| Infections and infestations - Other, specify | 1 |
| Lung infection                               | 2 |
| Sepsis                                       | 2 |
| Typhlitis                                    | 3 |
| <b>Renal</b>                                 |   |
| Acute kidney injury                          | 3 |
| Hemolytic uremic syndrome                    | 1 |
| Proteinuria                                  | 1 |
| Urine output decreased                       | 3 |

## 2.2 Supplemental Figure Legends

Supplemental Figure 1. Additional Across Trial Details. (A) Graph of number of patients treated per year on each of the 3 trials. (B) Dot plot of number of  $\geq$ Gr3 AEs per system on each of the 3 trials. Median represented by horizontal black line; if no line present, the median is equal to 0. Abbreviations: Gr = grade, NC = non-cytopenia, AE = adverse event, GI = gastrointestinal.

Supplemental Figure 2. System Based Analysis in Specific Sub-groups. (A) Pie graph of  $\geq$ Gr3 AEs in patients who received prior inotuzumab. (B) Pie graph of  $\geq$ Gr3 NC AEs attributed to disease only—AEs deemed unlikely due to CAR T-cell therapy and likely due to underlying leukemia. Abbreviations: Gr = grade, AE = adverse event, GI = gastrointestinal

Supplemental Figure 3. Multivariable Analysis of Pre-CAR Factors. (A) Linear regression predictive model for patients on CD19 trial. Graph demonstrates predicted versus actual values of  $\geq$ Gr3 NC AEs based on formula  $0.20 * \text{age} + 0.034 * \text{actual (0-99) marrow disease level}$ ; adjusted r2 value 0.46. (B) Linear regression predictive model for patients on CD22 trial. Graph demonstrates predicted versus actual values of  $\geq$ Gr3 NC AEs based on formula  $-3.87 \text{ (if prior CAR)} + 4.07 * (1, 2, \text{ or } 3 \text{ depending on marrow disease})$ ; adjusted r2 value 0.51.

Supplemental Figure 4. Incidence of Focused  $>$ Gr3 NC AEs Across Trials and based on CRS, Disease Burden and Response. (A) & (B) Dot plot of the number of  $>$ Gr3 AEs (and  $>$ Gr3 NC AEs) per patient by trial with horizontal line representing the median per patient. Pair-wise rank comparisons by Mann-Whitney are represented by p values at the top of graphs, with Kruskal-Wallis comparisons across all 3 trials to the right. (C) Dot plot of  $>$ Gr3 NC AEs in patients based on presence of CRS. (D) Dot plot of  $>$ Gr3 NC AEs in patients based on severity of CRS max grade 1-2 vs 3-4 as graded per ASTCT guidelines. (E) Dot plot of  $>$ Gr3 NC AEs in patients based on baseline bone marrow disease; M1  $<$ 5%, M2 5-25%, M3  $>$ 25%. (F) Dot plot of  $>$ Gr3

NC AEs in patients based on complete response (CR) compared to those without complete response (No CR). (G) Dot plot of >Gr3 NC AEs in patients based on both CRS and response. +CR/+CRS = complete response with CRS, -CR/+CRS= no complete response with CRS, -CR/-CRS= no complete response without CRS, +CR/-CRS= complete response without CRS. Abbreviations: Gr = grade, NC = non-cytopenia, AE = adverse event, CRS = cytokine release syndrome, CR = complete response

Supplemental Figure 5. Incidence of >Gr3 NC AEs in patients Based on Pre-CAR Factors in Focused Analysis. (A) Dot plot of >Gr3 NC AEs in patients by presence of extramedullary disease (EMD). (B) Dot plot of >Gr3 NC AEs in patients by presence of central nervous system (CNS) disease. CNS1=0 blasts on cytospin, CNS2+ = some degree of CNS disease, either CNS2 (< 5/ $\mu$ l WBCs, cytospin positive for blasts) or CNS3 ( $\geq$  5/ $\mu$ l WBCs, cytospin positive for blasts). (C) Dot plot of >Gr3 NC AEs in patients by age. (D) Dot plot of >Gr3 NC AEs in patients by Sex. (E) Dot plot of >Gr3 NC AEs in patients by Ethnicity. (F) Dot plot of >Gr3 NC AEs in patients by Race; due to small numbers analysis was grouped into White vs Non-White, with Non-White including: African American, Asian, Hawaiian/PI, Multi-Race; 15 patients with Unknown race were excluded from this analysis. (G) Dot plot of >Gr3 NC AEs in patients by number of prior treatment regimens excluding prior HSCT. (H) Dot plot of >Gr3 NC AEs in patients by prior HSCT. (I) Dot plot of >Gr3 NC AEs in patients by prior CAR T-Cell Therapy. (J) Dot plot of >Gr3 NC AEs in patients by prior receipt of blinatumomab. (K) Dot plot of >Gr3 NC AEs in patients by prior receipt of inotuzumab. Abbreviations: Gr = grade, NC = non-cytopenia, AE = adverse event, EMD = extramedullary disease, CNS = central nervous system, HSCT = hematopoietic stem cell transplant, CAR = chimeric antigen receptor

A

## Patients Treated Over Time

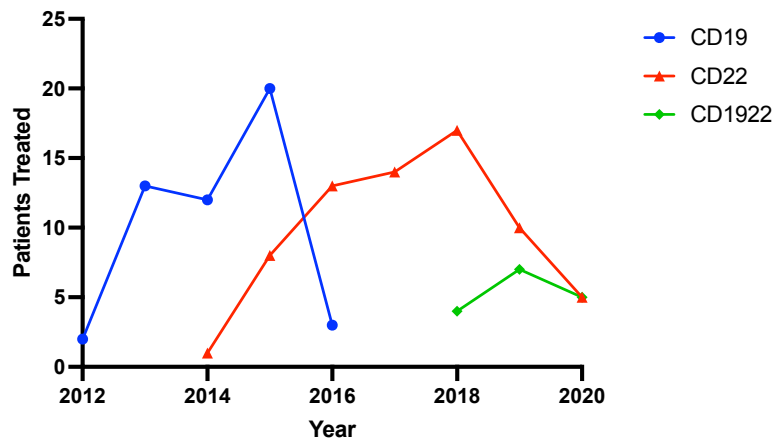

B

## Median AEs by System

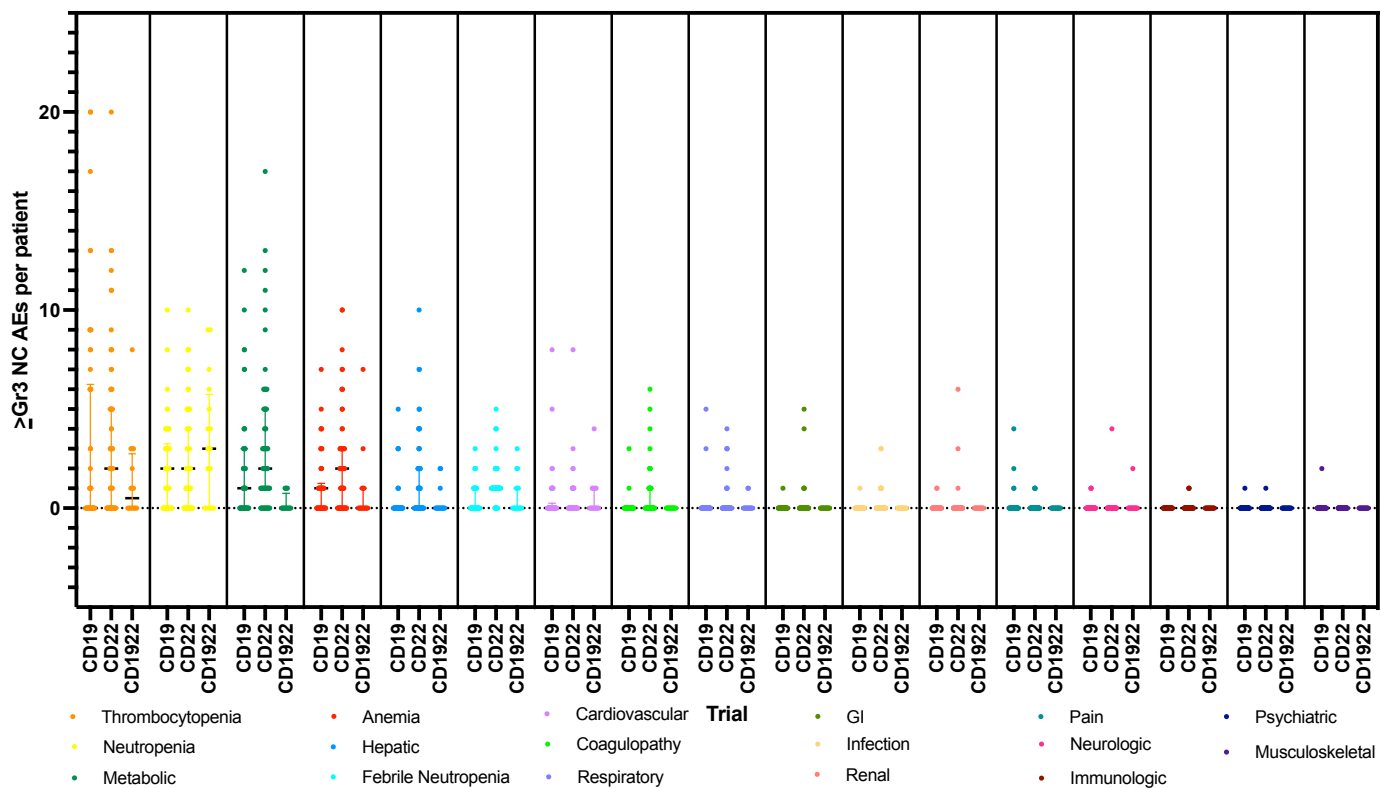

A

**≥ Gr 3 AEs in Patients Receiving Prior Inotuzumab**

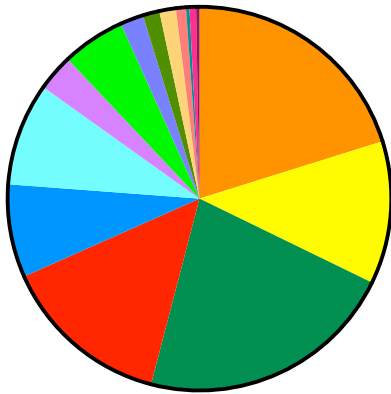

**Total=357**

- 20.17% Thrombocytopenia
- 12.04% Neutropenia
- 21.85% Metabolic
- 14.29% Anemia
- 7.84% Hepatic
- 8.68% Febrile Neutropenia
- 3.08% Cardiovascular
- 5.32% Coagulopathy
- 1.96% Respiratory
- 1.40% GI
- 1.40% Infection
- 0.84% Renal
- 0.28% Pain
- 0.56% Neurologic
- 0.28% Immunologic

B

**Non-Cytopenia ≥ Gr 3 AEs Attributed to Disease Only**

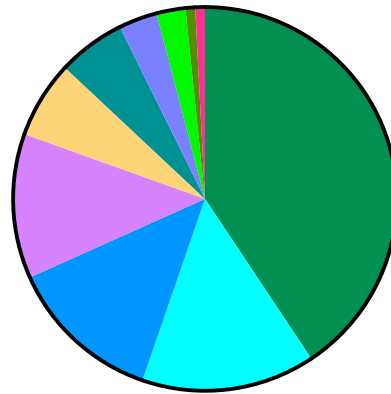

**Total=123**

- 40.65% Metabolic
- 14.63% Febrile Neutropenia
- 13.01% Hepatic
- 12.20% Cardiovascular
- 6.50% Infection
- 5.69% Pain
- 3.25% Respiratory
- 2.44% Coagulopathy
- 0.81% GI
- 0.81% Neurologic

## A. Linear Regression Predictive Model, CD19

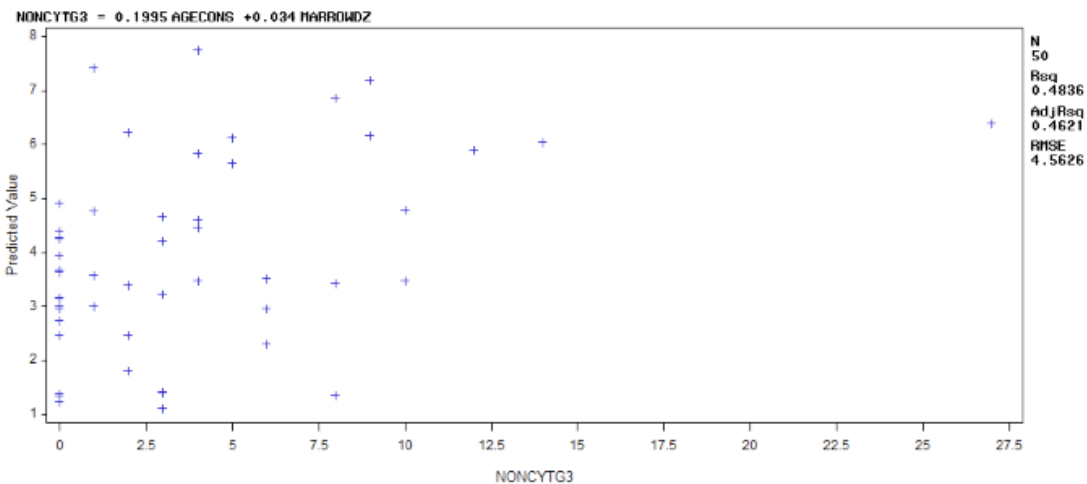

## B. Linear Regression Predictive Model, CD22

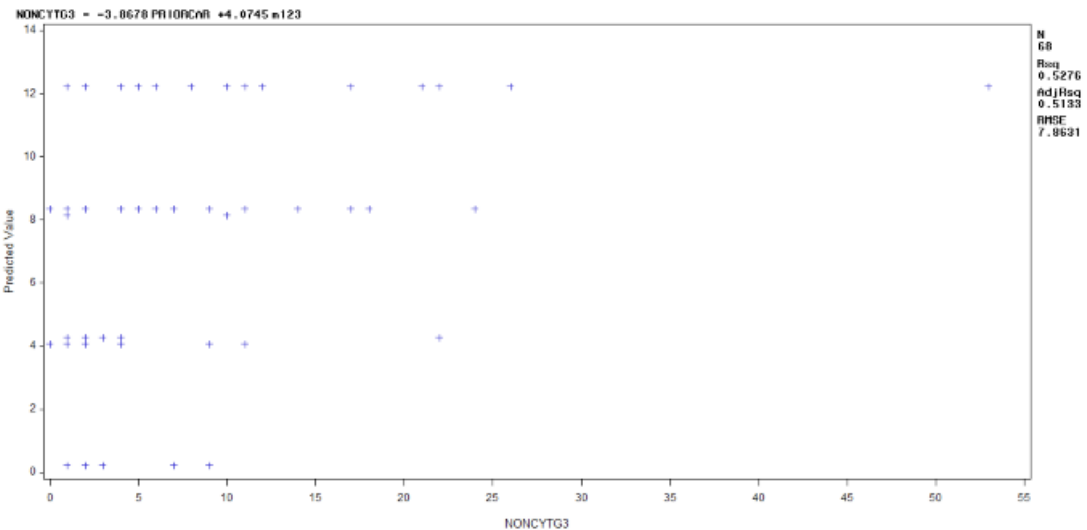

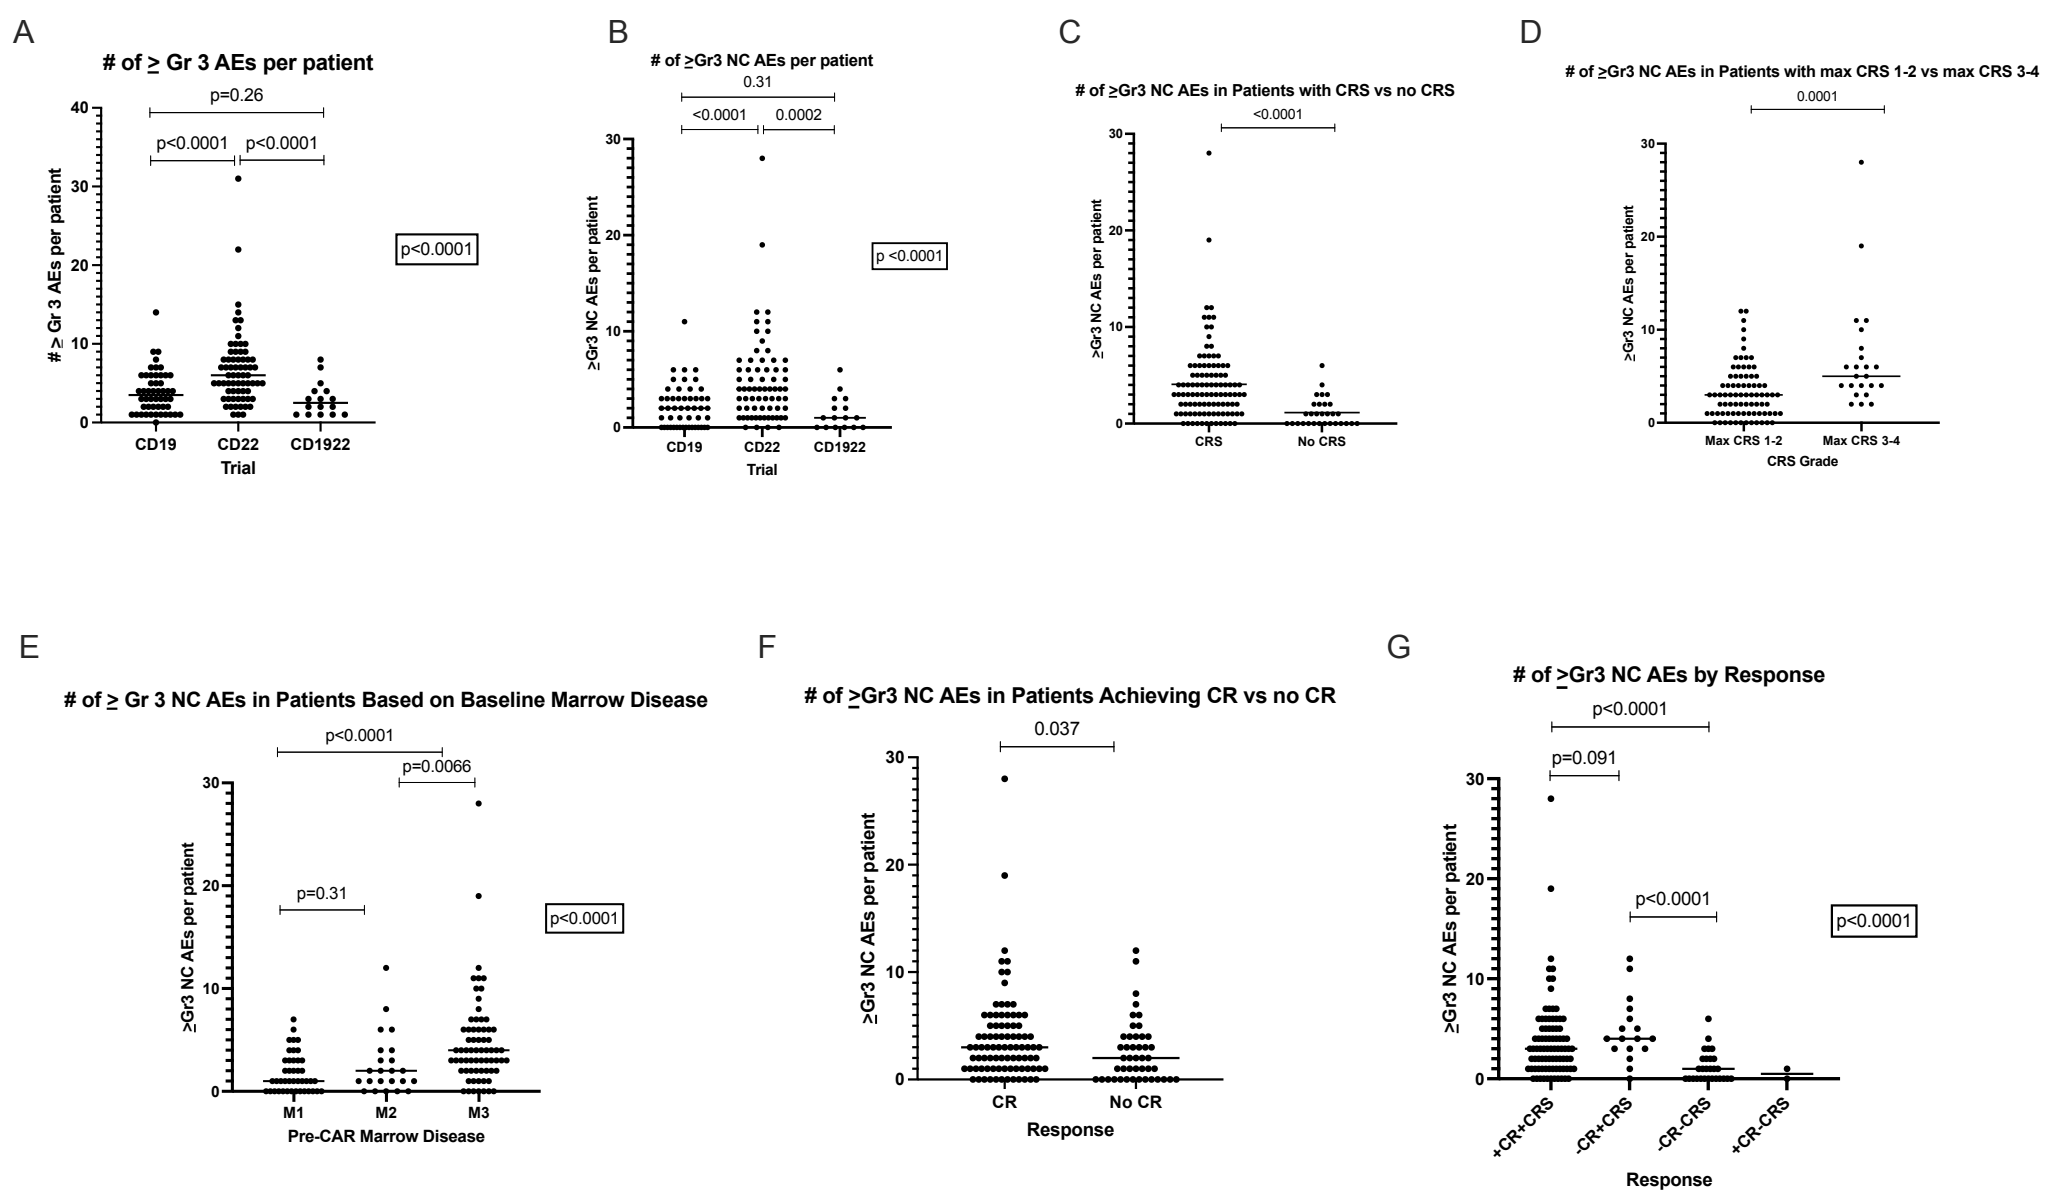



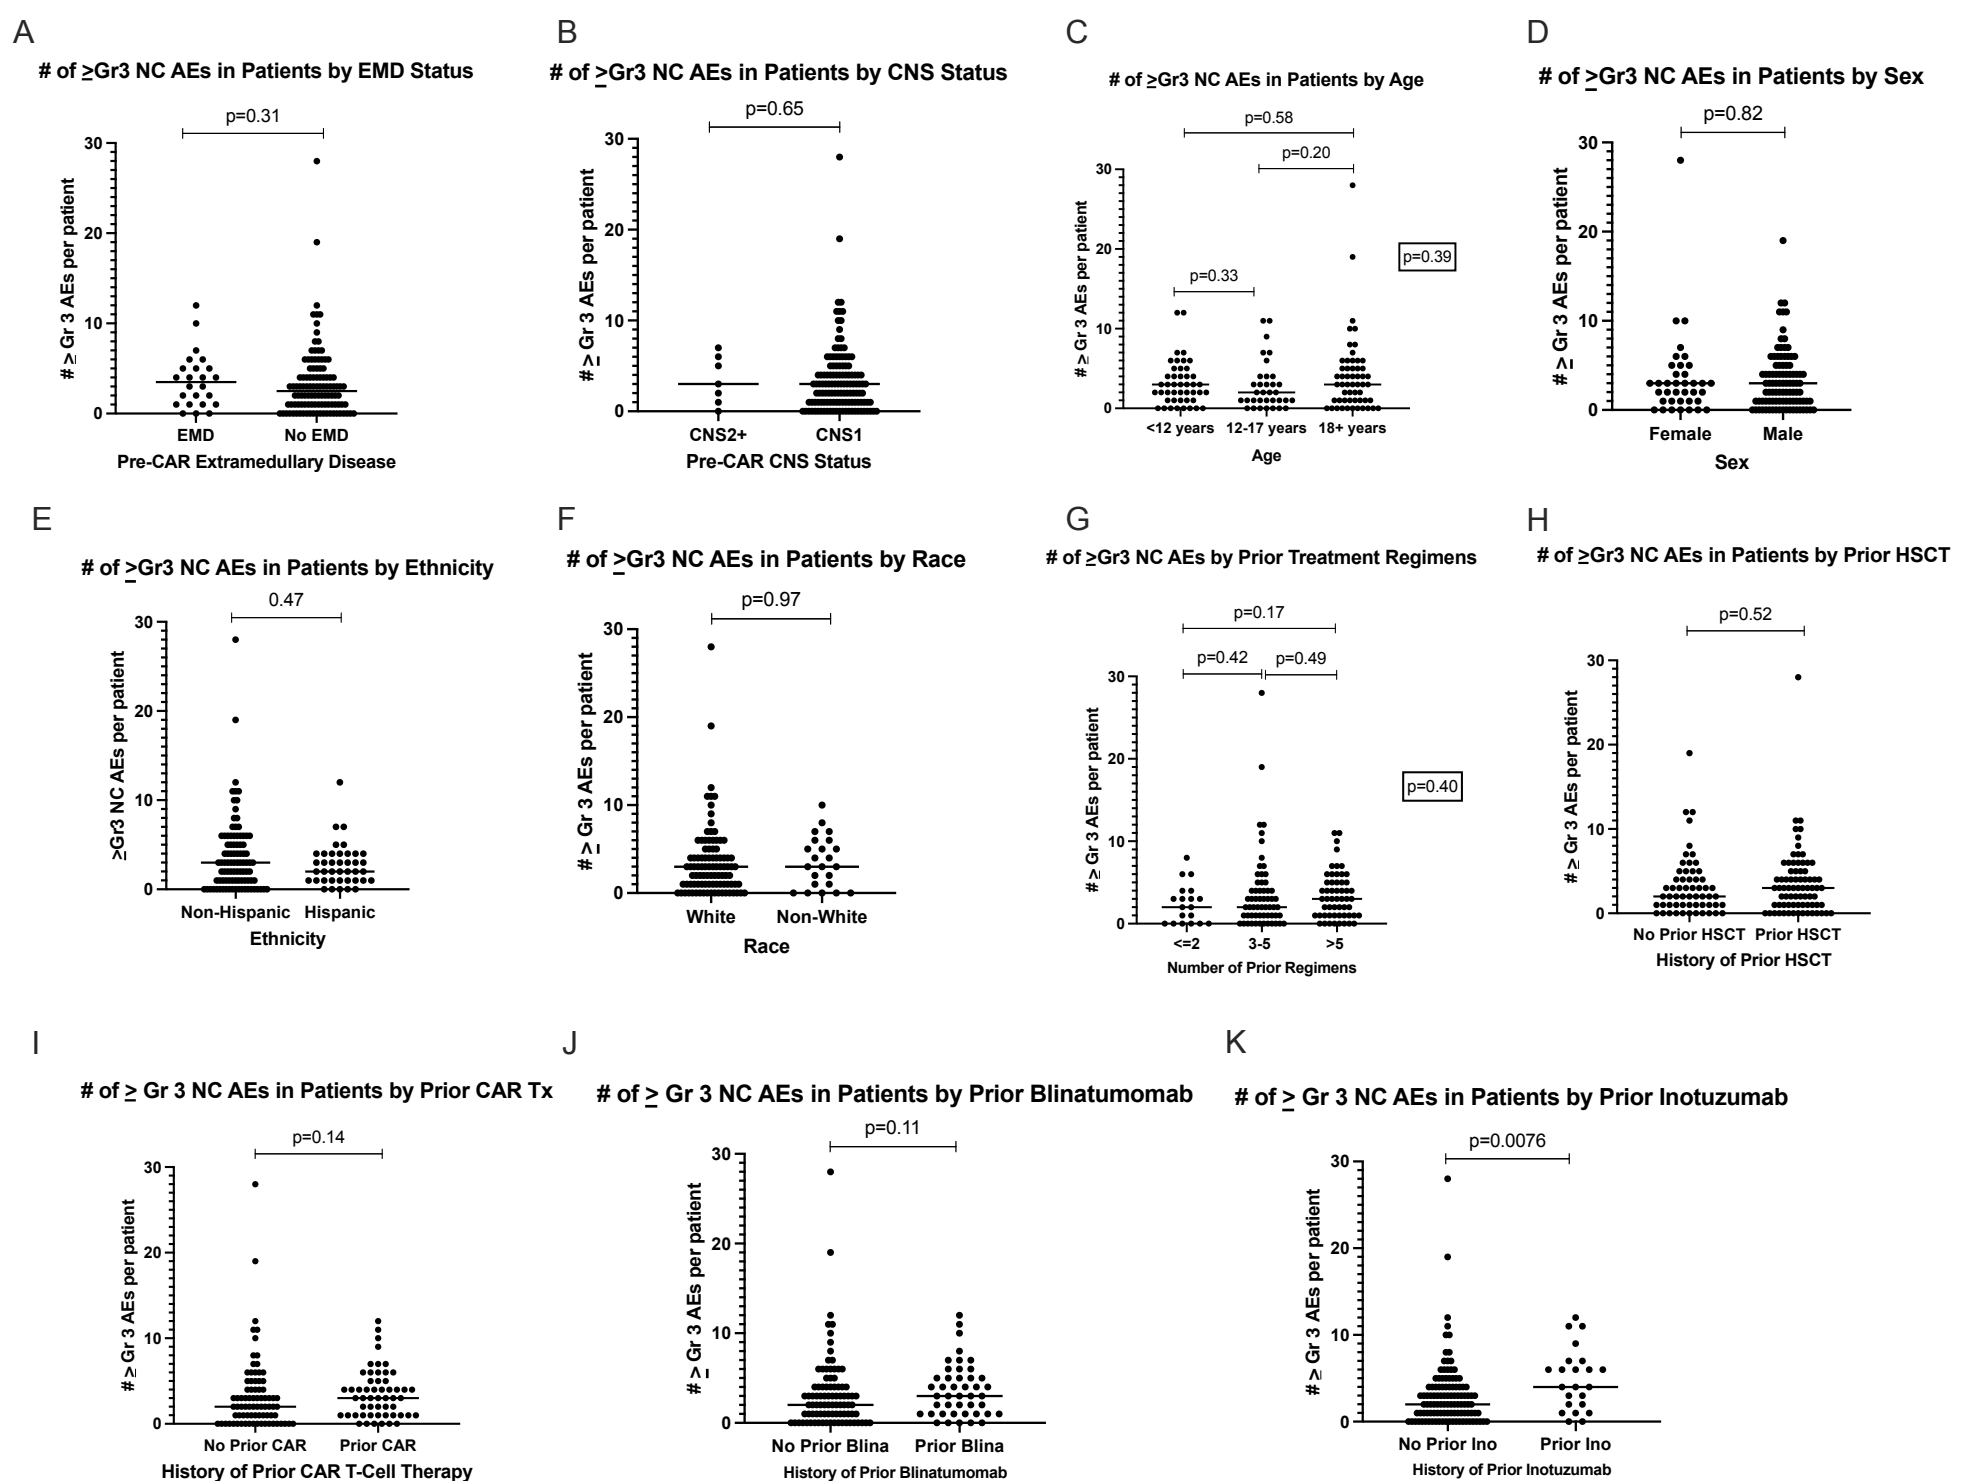

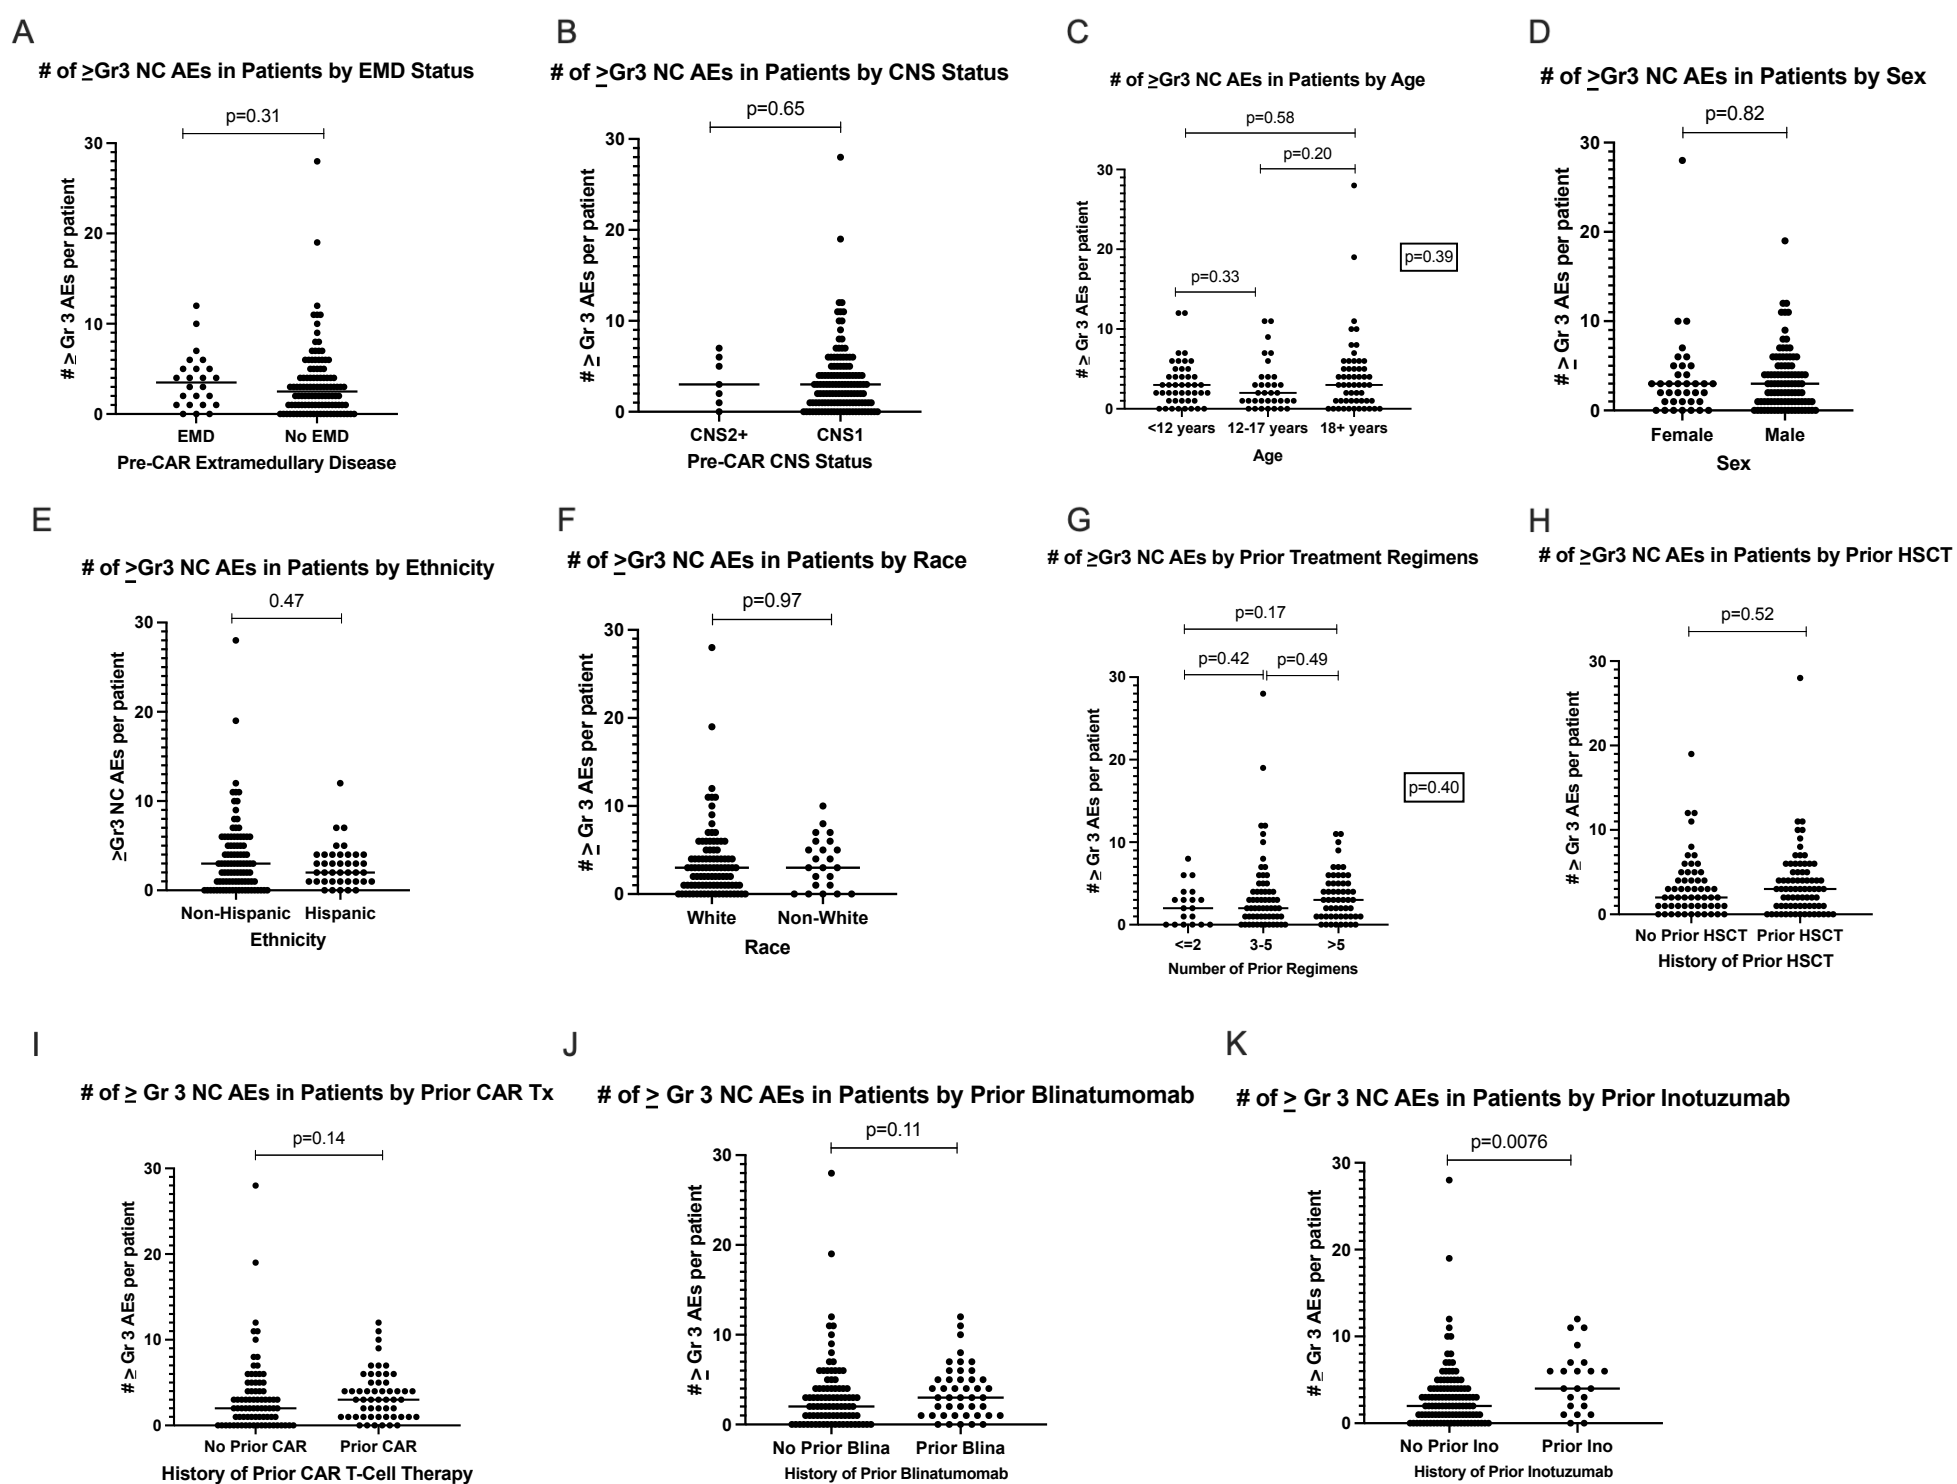

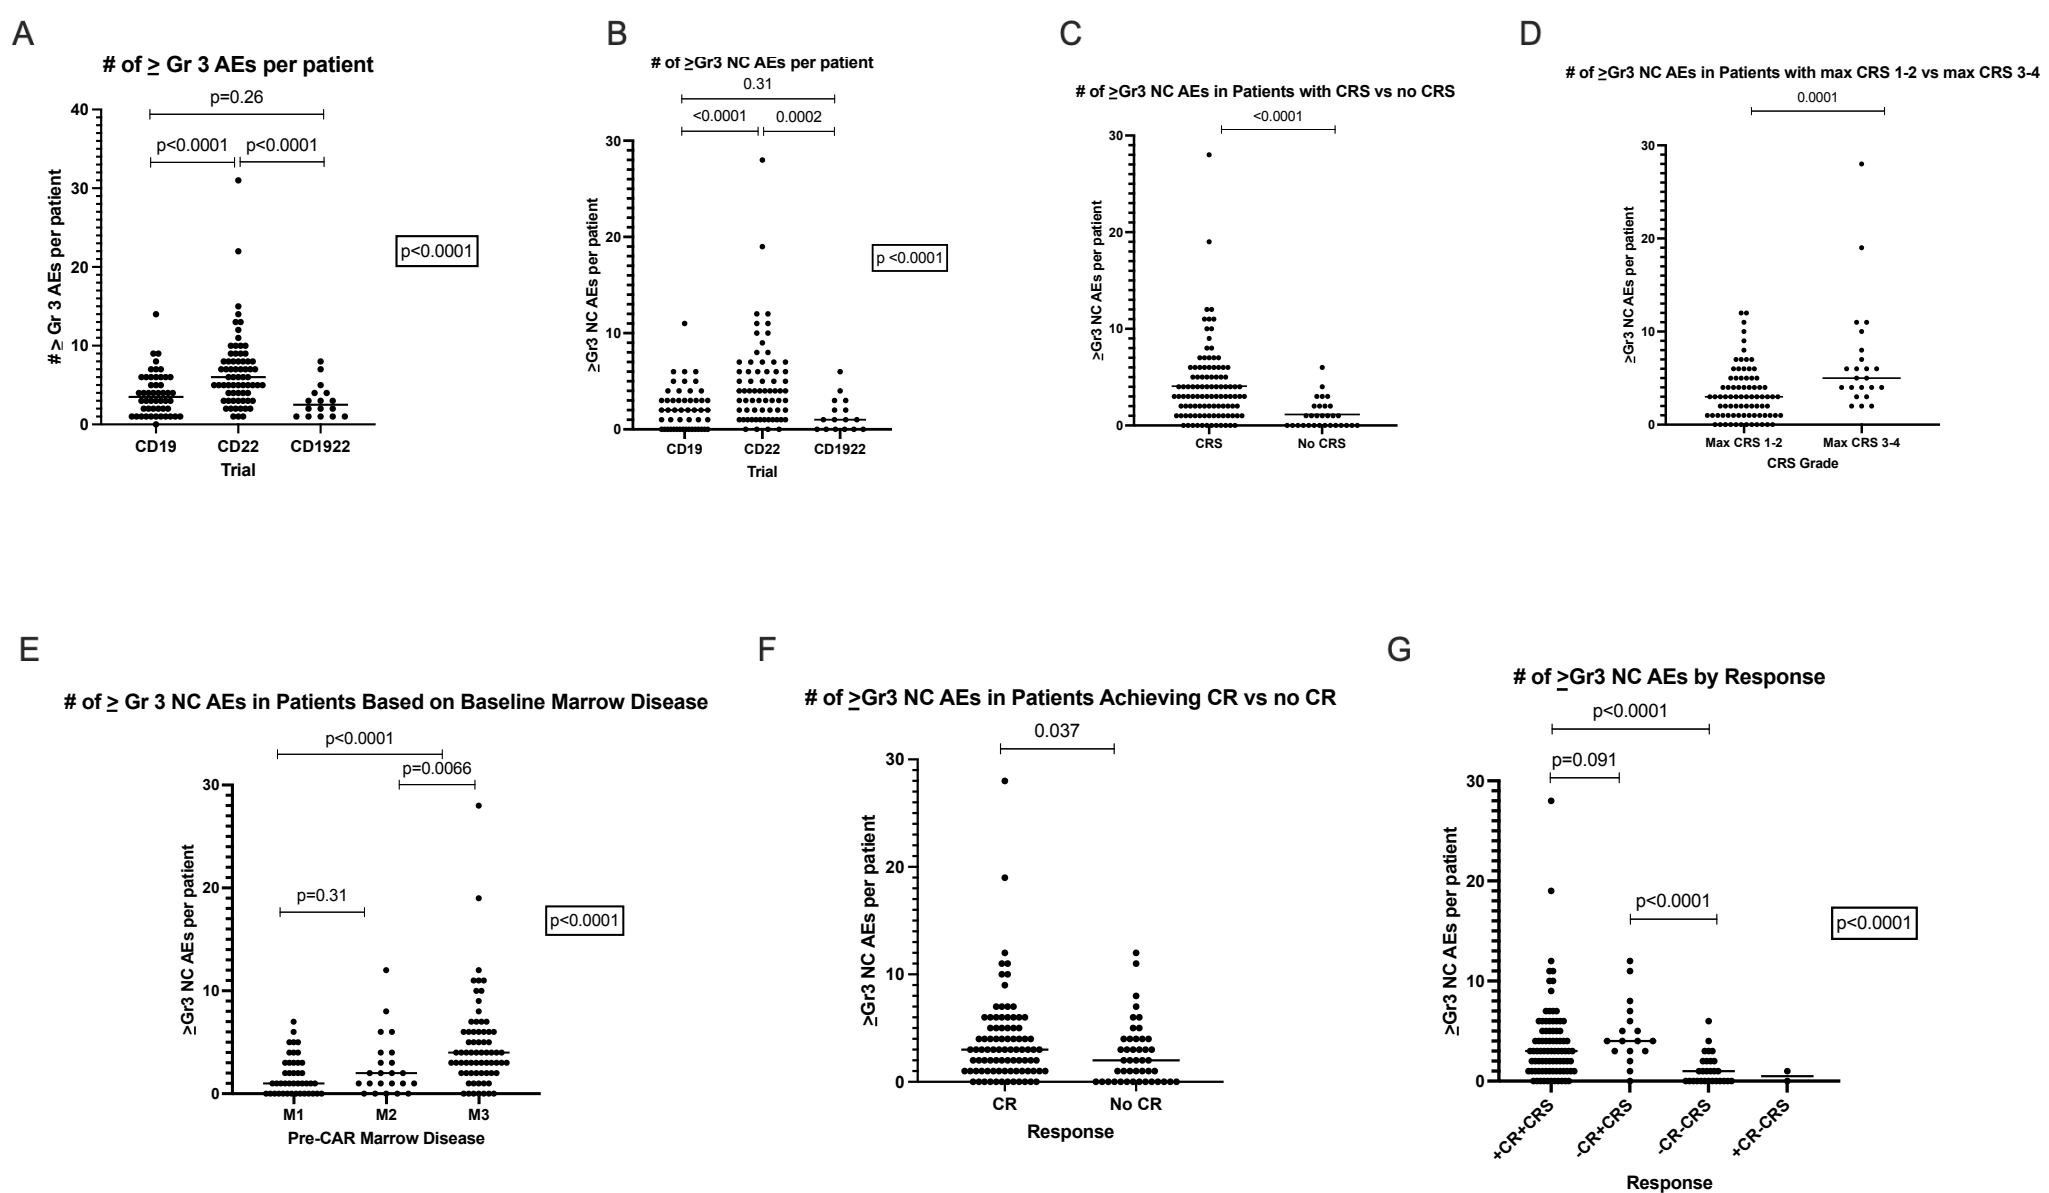

Supplement: BLOODA_ADV-2023-009789-mmc1.pdf [file BLOODA_ADV-2023-009789-mmc1.pdf]
